# Supplementary material for: Aberrant dynamics of cognitive control and motor circuits predict distinct restricted and repetitive behaviors in children with autism
Source: PubMed Central journal article supplement (PMC8192778; doi:10.1038/s41467-021-23822-5), 2021-06-10
Supplement: 41467_2021_23822_MOESM1_ESM.pdf [file 41467_2021_23822_MOESM1_ESM.pdf]

# Supplementary Materials

## I. Supplementary Methods

### Participants

ADI-R Factor Analysis. One hundred and twenty-six children with ASD (112 males, 14 females; age:  $10.0 \pm 1.6$  years; IQ:  $110 \pm 16$ ) participated in this study after written informed consent was obtained from their legal guardian. The study protocol was approved by the Stanford University Institutional Review Board. Participants were recruited locally, from schools and clinics near Stanford University. All children were required to have a Full Scale IQ  $> 70$ , as measured by the Wechsler Abbreviated Scale of Intelligence (WASI<sup>1</sup>).

fMRI. Forty-eight children with ASD (41 males, 7 females; age:  $10.9 \pm 1.9$  years; IQ:  $115 \pm 16$ ) and 48 age- and gender-matched TD children (41 males, 7 females; age:  $10.9 \pm 1.7$  years; IQ:  $118 \pm 11$ ) participated in this study after written informed consent was obtained from their legal guardian (Supplementary Table 1, Supplementary Figure 1). The study protocol was approved by the Stanford University Institutional Review Board. Participants were recruited locally, from schools and clinics near Stanford University. All children were required to have a Full Scale IQ  $> 70$ , as measured by WASI.

Children with ASD received a diagnosis based on scores from the ADI-R<sup>2,3</sup> and/or the Autism Diagnostic Observation Schedule (ADOS)<sup>4</sup> following criteria established by the National Institute of Child Health & Human Development/National Institute of Deafness and Other Communication Disorders Collaborative Programs for Excellence in Autism<sup>5</sup>. Children with

24 ASD were screened through a parent phone interview and excluded if they had any history of  
25 known genetic, psychiatric, or neurological disorders (e.g., Fragile X syndrome or Tourette's  
26 syndrome), or were currently prescribed anti-psychotic medications. TD children were screened  
27 and excluded if they or a first-degree relative had developmental, language, learning,  
28 neurological, psychiatric disorders, or psychiatric medication usage, or if the child met the  
29 clinical criteria for a childhood disorder on the Child Symptom Inventory – Fourth Edition or  
30 Child and Adolescent Symptom Inventory. All participants underwent a battery of standardized  
31 neuropsychological assessments including WASI <sup>1</sup>, and the Wechsler Individual Achievement  
32 Test (WIAT, 2<sup>nd</sup> edition).

33

#### 34 **ADI-R factor analysis**

35 To determine RRB subtypes, we applied principal component analysis (PCA) with varimax  
36 rotation on 9 ADI-R items that assess RRBs<sup>6</sup> (Supplementary Table 2). The number of factors  
37 was determined by a combination of scree plot and eigenvalue greater than 1<sup>6</sup>.

38

#### 39 **fMRI data acquisition**

40

41 For each subject a resting-state fMRI scan was acquired using the following protocol. Functional  
42 images were acquired on a 3T General Electric (GE) Signa scanner using a custom-built head  
43 coil. Head movement was minimized during scanning by small foam cushions placed on the  
44 sides of the subject's head. A total of 29 axial slices (4.0 mm thickness, 0.5 mm skip) parallel to  
45 the AC-PC line and covering the whole brain were imaged with a temporal resolution of 2 s  
46 using a T2\* weighted gradient echo spiral in-out pulse sequence <sup>7</sup> with the following parameters:

47 TR = 2,000 msec, TE = 30 msec, flip angle = 80 degrees, 1 interleave. The field of view was 20  
48 cm, and the matrix size was 64×64, providing an in-plane spatial resolution of 3.125 mm. To  
49 reduce blurring and signal loss arising from field inhomogeneities, an automated high-order  
50 shimming method based on spiral acquisitions was used before acquiring functional MRI scans.  
51 Participants were repeatedly instructed to stay awake, keep their eyes closed and try not to move  
52 for the duration of the 6-min scan. To avoid the influence of task and prevent drowsiness, the  
53 resting-state scans were placed at the beginning of the scanning session. A T1-weighted  
54 structural imaging scan was also acquired in the same session.

55

56

57

## 58 **fMRI data preprocessing and analysis**

### 59 *Preprocessing*

60 A standard preprocessing procedure was implemented using SPM8, including slice-timing  
61 correction, realignment, normalization, spatial smoothing (6-mm smoothing kernel), regression  
62 of nuisance variables (24 motion parameters, signals from the white matter and CSF), and  
63 bandpass filtering ( $0.008 \text{ Hz} < f < 0.1 \text{ Hz}$ ). The 24 motion parameters include  $[R \ R^2 \ R_{t-1} \ R_{t-1}^2]$ ,  
64 where t and t-1 refer to the current and immediately preceding timepoint and  $R = [X \ Y \ Z \ \text{pitch}$   
65  $\text{yaw} \ \text{roll}]$ . The motion parameters did not differ between the ASD and TD groups  
66 (Supplementary Table 1).

67

### 68 *Network identification*

69 Preprocessed fMRI data were entered into a group independent component analysis (ICA) to

70 identify large-scale networks in the combined population (MELODIC,  
71 <http://fsl.fmrib.ox.ac.uk/fsl/fslwiki/MELODIC>). The number of components was set to 30.  
72 Determining the number of components using an unsupervised learning algorithm like ICA  
73 remains an unresolved challenge. Our choice of 30 components was based on findings from a  
74 seminal study<sup>8</sup> that comprehensively evaluated the influence of the number of components on  
75 the accuracy of ICA results. The study found that the quality of ICA estimation does not improve  
76 once the ICA components are being estimated in a subspace with more than 30 dimensions and  
77 that reducing the number of components below 30 results in poor estimation. Four components  
78 (SN, left and right CEN, and DMN) corresponding to the previously described triple-network  
79 model of cognitive control<sup>9</sup> and two components (cMN, sMN) corresponding to the motor  
80 circuit were determined based on a widely-used visual inspection procedure<sup>10,11</sup>. Briefly, an  
81 expert (K.S.) examined the spatial and temporal profile of each of the 30 ICA components and  
82 labelled it as SN, DMN, Left CEN, Right CEN, cMN, sMN or other. These labels were further  
83 confirmed by a quantitative template-matching procedure<sup>12</sup>. The template matching procedure  
84 involved taking the average z score of voxels falling within the template minus the average z  
85 score of voxels outside the template and selecting the component in which this difference (the  
86 goodness of fit) was the greatest. The templates for SN, DMN, Left CEN, Right CEN, cMN and  
87 sMN were identified from previously published adult studies<sup>13,14</sup>. The template matching  
88 procedure is identical to those used in previous published studies<sup>11</sup>.

89

90 *Dynamic functional brain circuit analysis*

91 Cognitive Control Circuit. Time-varying cross-network interaction was measured using a  
92 dynamic functional connectivity approach<sup>15-17</sup>. Our overall analysis pipeline is illustrated in

93 Figure 1B. We estimated dynamic functional interactions between SN, CEN, and DMN using an  
94 exponentially decaying sliding window and a window length of 50 seconds (25 TRs) and a  
95 sliding step of 2 seconds (1 TR) <sup>15,18,19</sup>. Exponentially decaying weights were applied to each  
96 time point within a window as described in previous studies <sup>15,16</sup>. Within each time window, we  
97 computed the z-transformed Pearson correlation between the ICA time-series taken pairwise.  
98 This resulted in a time-series of correlation matrices (T x C); here T is the number of time  
99 windows and C is number of pairwise interactions among SN, CEN, DMN at each time point. To  
100 identify distinct group-specific states associated with dynamic functional connectivity, we  
101 applied a group-wise k-means clustering on the time-series of correlation matrices in each group  
102 separately with the number of clusters (k) ranging from 2 to 20, using Matlab kmeans function.  
103 Twenty-five different initializations were used to reduce the chance of local minima. The number  
104 of initializations we used is considerably higher than the Matlab as well as Python sklearn  
105 recommended/default number of replicates (=10), while at the same time within reasonable  
106 computational capacity. Clustering performance was estimated using the silhouette method and  
107 the optimal number of clusters was determined based on maximal silhouette across all the  
108 iterations <sup>20</sup>. Because our goal was to investigate whether dynamic temporal properties differed  
109 between the two groups we allowed the number of clusters to differ between the children with  
110 ASD and TD children groups, instead of keeping them exactly the same <sup>18</sup>. Robustness of our  
111 findings was tested using different window lengths.

112

113 Brain state-specific cognitive network interaction index (CNII) was used to characterize cross-  
114 network interaction in each dynamic brain state. CNII measures cross-network interactions  
115 among the three networks based on the hypothesized role of the SN in switching interactions

116 with the CEN and DMN <sup>9,21</sup>. CNII has the advantage of capturing interactions simultaneously  
 117 among all three networks. Specifically, CNII was computed as the difference in correlation  
 118 between SN and CEN time series and correlation between SN and DMN. The rationale here is  
 119 that SN and CEN are typically co-activated during cognitively demanding tasks, while SN and  
 120 DMN are typically anti-correlated <sup>21,22</sup>. CNII thus captures the extent to which SN temporally  
 121 engages with CEN and dissociate itself from DMN.

$$122 \quad CNII = f(CC_{SN,CEN}) - f(CC_{SN,DMN})$$

123 where

$$124 \quad f(CC) = \frac{1}{2} \ln \left( \frac{1 + CC}{1 - CC} \right)$$

125  
 126  $CC$  is Pearson's correlation between the time series of two component networks, e.g.,  $CC_{SN, DMN}$   
 127 refers to correlation between the time series of SN and DMN.  $f(CC)$  computes Fisher z-  
 128 transform of Pearson Correlation ( $CC$ ) between ROI timeseries. Thus for instance,  $f(CC_{SN,CEN})$   
 129 computes Fisher z-transform of Pearson Correlation between the time series of SN and CEN.  
 130  $f(CC_{SN,LCEN})$  and  $f(CC_{SN,RCEN})$  were computed separately and then their average was used as  
 131  $f(CC_{SN,CEN})$ . Larger CNII values reflect more segregated cross-network interactions between the  
 132 SN-CEN and SN-DMN systems in the context of the triple-network model. We computed CNII  
 133 for each sliding window, and then computed the (i) mean and (ii) variability (measured by  
 134 standard deviations) of time-varying CNII across all the dynamic brain states for each participant  
 135 and examined the difference between the mean and variability of time-varying CNII between the  
 136 two groups using two sample  $t$ -tests.

137

138 Motor Circuit. Time-varying cross-network interaction was measured using a similar dynamic  
139 functional connectivity approach<sup>15-17</sup>. Our overall analysis pipeline is illustrated in Figure 1D.  
140 Briefly, we first estimated dynamic functional interactions between cMN and sMN using an  
141 exponentially decaying sliding window. Second, we identified distinct group-specific states  
142 associated with dynamic functional connectivity, using the group-wise 1D k-means clustering.  
143 Third, we characterized cross-network interaction in each dynamic brain state, using brain state-  
144 specific motor network interaction index (MNII). MNII measures cross-network interactions  
145 among the two networks involved in motor function and was computed as the correlation  
146 between cMN and sMN time series. MNII thus captures the extent to which cMN temporally  
147 engages with sMN. We computed MNII for each sliding window, and then computed the (i)  
148 mean and (ii) variability (measured by standard deviations) of time-varying MNII for each  
149 participant and examined the difference between the mean and variability of time-varying MNII  
150 between the two groups using two sample *t*-tests.

151

152 *Prediction analysis to determine the relation between temporal dynamics of cognitive control*  
153 *circuit and RRB subtypes in children with ASD*

154 We used regression analysis to examine the relation between temporal dynamics of cognitive  
155 control circuit and RRB subtypes in children with ASD. Mean and variability of CNII as  
156 independent variables and RRB subtype (CI, IS or RM) severity score as dependent variable was  
157 used as the input to a non-parametric linear regression algorithm. Both mean and variability of  
158 CNII were used as independent variables as they were significantly different between the  
159 children with ASD and TD children groups. To further examine the predictive ability of  
160 cognitive control dynamics, we leveraged our sample and conducted cross-validation analyses

161 following procedures typically used in machine learning. Cross-validation is a powerful  
162 approach for validating research findings, and its use for demonstrating generalization and  
163 reproducibility has been advocated in psychiatry, psychology and many other disciplines<sup>23,24</sup>.  
164 Data were divided into five folds, consistent with the number of folds recommended for  
165 predictions studies<sup>25</sup>. A non-parametric linear regression model was built/trained using four  
166 folds, leaving out one fold. The samples in the left-out fold were then predicted using this trained  
167 model, and the predicted values were noted. This procedure was repeated five times, and finally  
168 an  $r(\text{pred}, \text{actual})$  was computed based on the predicted and actual values.  $r(\text{pred}, \text{actual})$ ,  
169 correlation between the predicted value of the trained linear regression model and the actual  
170 value, was used as a measure of how well the independent variable predicts dependent variable,  
171 with  $r(\text{pred}, \text{actual}) = 1$  being the most accurate prediction model. Finally, the statistical  
172 significance of the model was assessed using nonparametric analysis. The empirical null  
173 distribution of  $r(\text{pred}, \text{actual})$  was estimated by generating 1000 surrogate datasets under the null  
174 hypothesis that there was no association between temporal dynamics of cognitive control circuit  
175 and RRB subtype severity. Each surrogate dataset  $D_i$  of size equal to the observed dataset was  
176 generated by permuting the labels (dependent variable) on the observed data points.  $r(\text{pred},$   
177  $\text{actual})_i$  was computed using the actual labels of  $D_i$  and predicted labels using the five-fold cross-  
178 validation procedure described previously. This procedure produces a null distribution of  $r(\text{pred},$   
179  $\text{actual})$  for the regression model. The statistical significance ( $p$  value) of the model was then  
180 determined by counting the number of  $r(\text{pred}, \text{actual})_i$  greater than  $r(\text{pred}, \text{actual})$  and then  
181 dividing that count by the number of  $D_i$  datasets (1000 in our case). This analysis was conducted  
182 for three RRB subtypes, including CI, IS and RM. To assess the robustness of our approach we  
183 also repeated the aforementioned analysis with number of folds = 10.



184  
185  
186  
187  
188  
189  
190  
191  
192  
193  
194  
195  
196  
197  
198  
199  
200  
201  
202  
203  
204  
205  
206

*Prediction analysis to determine the relation between temporal dynamics of motor circuit and RRB subtypes in children with ASD*

We used regression analysis to examine the relation between temporal dynamics of motor circuit and RRB subtypes in children with ASD. Mean of MNII as independent variables and RRB subtype (CI, IS or RM) severity score as dependent variable was used as the input to a non-parametric linear regression algorithm. Mean of MNII was used as independent variable as it was significantly different between the children with ASD and TD children groups. To further examine the predictive ability of motor circuit dynamics, we used the five cross-validation approach described above. Data were divided into five folds. A non-parametric linear regression model was built/trained using four folds, leaving out one fold. The samples in the left-out fold were then predicted using this trained model, and the predicted values were noted. This procedure was repeated five times, and finally an  $r(\text{pred}, \text{actual})$  was computed based on the predicted and actual values.  $r(\text{pred}, \text{actual})$ , correlation between the predicted value of the trained linear regression model and the actual value, was used as a measure of how well the independent variable predicts dependent variable, with  $r(\text{pred}, \text{actual}) = 1$  being the most accurate prediction model. Finally, the statistical significance of the model was assessed using nonparametric analysis. The empirical null distribution of  $r(\text{pred}, \text{actual})$  was estimated by generating 1000 surrogate datasets under the null hypothesis that there was no association between temporal dynamics of motor circuit and RRB subtype severity. Each surrogate dataset  $D_i$  of size equal to the observed dataset was generated by permuting the labels (dependent variable) on the observed data points.  $r(\text{pred}, \text{actual})_i$  was computed using the actual labels of  $D_i$  and predicted labels using

207 the five-fold cross-validation procedure described previously. This procedure produces a null  
208 distribution of  $r(\text{pred}, \text{actual})$  for the regression model. The statistical significance ( $p$  value) of  
209 the model was then determined by counting the number of  $r(\text{pred}, \text{actual})_i$  greater than  $r(\text{pred},$   
210  $\text{actual})$  and then dividing that count by the number of  $D_i$  datasets (1000 in our case). This  
211 analysis was conducted for three RRB subtypes, including CI, IS and RM. To assess the  
212 robustness of our approach we also repeated the aforementioned analysis with number of folds =  
213 10.

214

### 215 **Open-source publicly-available data**

216 We launched a search (Supplementary Figure 1) of publicly-available open source datasets.  
217 Specifically, we first examined in detail resting state fMRI and phenotypic data made available  
218 through the ABIDE I and ABIDE II initiatives ([http://fcon\\_1000.projects.nitrc.org/indi/abide/](http://fcon_1000.projects.nitrc.org/indi/abide/)).  
219 Although we were able to identify over 400 children with ASD and 400 TD children with good  
220 resting state fMRI data, none of the children with ASD had item-level ADI-R scores that are  
221 essential to determine RRB subtype severity scores. To address this, we requested item-level  
222 ADI-R scores from PIs of the ABIDE sites that included ASD children with good resting state  
223 fMRI data. Commendably, the PIs were quite prompt in their response, but unfortunately they  
224 did not have the resources to e-transcribe and share the item-level scores, which are collected in  
225 a paper form.

226

227 Our next quest for data led us to the National Institute of Mental Health Data Archive  
228 (NDA;<https://nda.nih.gov/>) – another open source dataset that makes available phenotypic and  
229 fMRI data from individuals with ASD and neurotypical individuals. Unfortunately, a

230 comprehensive examination of the NDA data yielded no participants who had both resting state  
231 fMRI data and item-level ADI-R scores. This exercise further highlights the uniqueness of our  
232 data and ensuing findings.

233

234

235

## 236 **II. Supplementary Results**

### 237 **Ruling out potential confounds on between-group comparisons**

239 Mean of dynamic time-varying CNII values were significantly different between children with  
240 ASD and TD children groups ( $p < 0.05$ , Supplementary Table 3), even after controlling for the  
241 potential confounding effects of age, movement, sex, and IQ.

242  
243 Variability of dynamic time-varying CNII values were significantly different between children  
244 with ASD and TD children groups ( $p < 0.05$ , Supplementary Table 4), even after controlling for  
245 the potential confounding effects of age, movement, sex, and IQ.

246  
247 Mean of dynamic time-varying MNII values were significantly different between children with  
248 ASD and TD children groups ( $p < 0.05$ , Supplementary Table 5), even after controlling for the  
249 potential confounding effects of age, movement, sex, and IQ.

### 250 251 **Analysis of brain states**

252 We compared mean dwell times across states and found that none of the states had mean dwell  
253 time significantly higher than other states, and none of the states had mean dwell time  
254 significantly lower than other states. This result was observed for brain states associated with  
255 cognitive control circuit dynamics as well as motor circuit dynamics in the ASD and TD groups  
256 suggesting that these brain states are equally probable.

### 257 **Prediction analysis results with 10-fold cross validation.**

258

259 Results of regression analysis with 10-fold cross validation were consistent with the results  
260 obtained with 5-fold cross validation, namely: (i) mean and variability of CNII was predictive of  
261 CI scores and IS scores, but not RM scores ( $r(\text{pred, actual})_{\text{CI}}=0.29$ ,  $p_{\text{CI}}=0.01$ ;  $r(\text{pred,}$   
262  $\text{actual})_{\text{IS}}=0.26$ ,  $p_{\text{IS}}=0.01$ ;  $r(\text{pred, actual})_{\text{RM}}=-0.11$ ,  $p_{\text{RM}}=0.42$ ), (ii) mean of MNII was predictive of  
263 RM scores, but not CI and IS scores ( $r(\text{pred, actual})_{\text{RM}}=0.22$ ,  $p_{\text{RM}}=0.02$ ;  $r(\text{pred, actual})_{\text{CI}}=-0.15$ ,  
264  $p_{\text{CI}}=0.38$ ;  $r(\text{pred, actual})_{\text{IS}}=0.14$ ,  $p_{\text{IS}}=0.08$ ).

265

### 266 **Relationship between time-averaged cross-network functional interactions and RRB** 267 **subtypes in children with ASD**

268

269 We examined the relationship between time-averaged functional interactions in the cognitive  
270 control circuit and ADI-R RRB factor scores. None of the time-averaged cross-network  
271 interactions in the cognitive control circuit were associated with CI, IS and RM scores (all  $p$ 's >  
272 0.05).

273 We examined the relationship between time-averaged functional interactions in the motor circuit  
274 and ADI-R RRB factor scores. Time-averaged cross-network interactions in the motor circuit  
275 were not significantly associated with CI, IS and RM scores (all  $p$ 's > 0.05).

276

### 277 **Robustness of brain-behavior findings against ADI-R factor structure**

278 First, we repeated the PCA-based factor analysis using python as well as SPSS. The results were  
279 identical to those originally reported (which were obtained using Matlab code), confirming the  
280 accuracy of our procedures. Second, we examined the relation between our ADI-R PCA factor

281 weights/loadings (Supplementary Table 2) and those published previously by Lam and  
282 Colleagues<sup>6</sup> on our findings. We computed subject-wise CI, IS and RM scores using the  
283 previously published weights. We found a high correlation between CI, IS and RM scores  
284 computed using our weights and CI, IS and RM scores using the previously published weights  
285 (Spearman  $\rho_{CI} = 0.88, p < 0.001, \rho_{IS} = 0.71, p < 0.001, \rho_{RM} = 0.86, p < 0.001$ ). Third, we  
286 examined the relationship between features of cognitive control circuit dynamics and CI, IS and  
287 RM scores that were computed using the previously published weights by Lam and colleagues.  
288 Cross-validation analysis revealed findings consistent with the results from the original analysis,  
289 namely: mean and variability of cognitive control circuit dynamics measure CNII was predictive  
290 of CI scores and IS scores, but not RM scores ( $r(\text{pred, actual})_{CI}=0.47, p_{CI}=0.001; r(\text{pred,}$   
291  $\text{actual})_{IS}=0.22, p_{IS}=0.03; r(\text{pred, actual})_{RM}=-0.37, p_{RM}=0.86$ ). Fourth, we examined the  
292 relationship between features of motor circuit dynamics and CI, IS and RM scores that were  
293 computed using the previously published weights. Results from this cross-validation analysis  
294 were consistent with the results from the original analysis, namely: mean of motor circuit  
295 dynamics measure MNII was predictive of RM scores, but not CI and IS scores ( $r(\text{pred,}$   
296  $\text{actual})_{RM}=0.34, p_{RM}=0.005; r(\text{pred, actual})_{CI}=0.02, p_{CI}=0.18; r(\text{pred, actual})_{IS}=0.11, p_{IS}=0.07$ ).  
297 Fifth, to further demonstrate the robustness of our findings, we examined CI, IS and RM scores  
298 by zeroing out the weights of the two items “resistance to trivial changes in the environment”  
299 and “difficulties in minor changes in subject’s environment” in our weights. Results from brain-  
300 behavior analyses using these CI, IS and RM scores were consistent with the results from the  
301 original analysis. Taken together, these results, further demonstrate the robustness of our main  
302 findings  
303

304 **Supplementary Tables**

305 **Supplementary Table 1.** Descriptive statistics for the children with autism spectrum disorder  
 306 (ASD) and typically-developing (TD) children groups. The two groups were matched on age,  
 307 sex, intelligent quotient (IQ) and head motion during functional MRI. Two sided two-sample t-  
 308 tests were used to compare age, IQ and head motion parameters between the children with ASD  
 309 and TD groups. Two sided Chi-Squared test was used to compare sex distribution between the  
 310 children with ASD and TD groups.

311

|                          | <b>ASD (n = 48)</b> | <b>TD (n = 48)</b> | <b><i>p</i></b> |
|--------------------------|---------------------|--------------------|-----------------|
| <b>Age</b>               | 10.9 ± 1.9 years    | 10.9 ± 1.7 years   | 0.99            |
| <b>Sex (male/female)</b> | 41/7                | 41/7               | 1               |
| <b>IQ</b>                | 115 ± 16            | 118 ± 11           | 0.27            |
| <b>Head Motion</b>       |                     |                    |                 |
| <i>Range</i>             |                     |                    |                 |
| X (mm)                   | 0.57 ± 0.62         | 0.56 ± 0.56        | 0.97            |
| Y (mm)                   | 0.79 ± 0.61         | 0.74 ± 0.64        | 0.66            |
| Z (mm)                   | 1.53 ± 0.99         | 1.46 ± 1.06        | 0.72            |
| Pitch (mm)               | 1.12 ± 1.06         | 0.97 ± 0.77        | 0.44            |
| Roll (mm)                | 1.46 ± 1.24         | 1.43 ± 1.26        | 0.89            |
| Yaw (mm)                 | 0.66 ± 0.67         | 0.60 ± 0.64        | 0.64            |

---

|                            |                 |                 |      |
|----------------------------|-----------------|-----------------|------|
| <i>Scan to Scan motion</i> | $0.15 \pm 0.11$ | $0.13 \pm 0.06$ | 0.17 |
| <i>(mm)</i>                |                 |                 |      |

---

312

313

314

315



316 **Supplementary Table 2.** Restricted and Repetitive Behavior (RRB) subtypes based on factor  
 317 analysis of items from the Autism Diagnostic Interview-Revised (ADI-R).

318

| ADI-R RRB Items                                              | CI   | IS   | RM   |
|--------------------------------------------------------------|------|------|------|
| 68 Circumscribed Interests                                   | .63  | .06  | .13  |
| 76 Unusual attachment to objects                             | .71  | -.09 | .01  |
| 75 Resistance to trivial changes in the environment          | .73  | .15  | -.04 |
| 70 Compulsions/Rituals                                       | .27  | .69  | .20  |
| 67 Unusual preoccupations                                    | -.10 | .83  | .01  |
| 74 Difficulties in minor changes in subject's environment    | .53  | .07  | .35  |
| 69 Repetitive use of objects or interest in parts of objects | .26  | .34  | .61  |
| 77 Hand and finger mannerisms                                | -.16 | .22  | .69  |
| 78 Other complex mannerisms/stereotyped body movements       | .22  | -.18 | .71  |

319

320

321 **Supplementary Table 3.** Multiple linear regression revealed that, after controlling for all  
322 potential confounds, mean of dynamic time-varying cognitive network interaction index (CNII)  
323 was still significantly different between the children with autism spectrum disorder (ASD) and  
324 typically-developing (TD) children groups.

325

|                     | t     | <i>p</i>      |
|---------------------|-------|---------------|
| Group               | -4.16 | <b>.00001</b> |
| Age                 | -.44  | .66           |
| Scan-to-Scan Motion | -1.67 | .10           |
| Sex                 | .05   | .60           |
| IQ                  | -.11  | .31           |
|                     |       |               |

326

327 **Supplementary Table 4.** Multiple linear regression revealed that, after controlling for all  
328 potential confounds, variability of dynamic time-varying cognitive network interaction index  
329 (CNII) was still significantly different between the children with autism spectrum disorder  
330 (ASD) and typically-developing (TD) children groups.

331 .

332

|                     | t    | <i>p</i>      |
|---------------------|------|---------------|
| Group               | 5.8  | <b>.00001</b> |
| Age                 | -.40 | .69           |
| Scan-to-Scan Motion | 1.29 | .20           |
| Sex                 | -.85 | .40           |
| IQ                  | -.79 | .43           |
|                     |      |               |

333

334 **Supplementary Table 5.** Multiple linear regression revealed that, after controlling for all  
335 potential confounds, mean of dynamic time-varying motor network interaction index (MNII) was  
336 still significantly different between the children with autism spectrum disorder (ASD) and  
337 typically-developing (TD) children groups.

|                     | t     | <i>p</i>    |
|---------------------|-------|-------------|
| Group               | 2.57  | <b>.012</b> |
| Age                 | -1.84 | .07         |
| Scan-to-Scan Motion | -.76  | .45         |
| Sex                 | -.71  | .48         |
| IQ                  | .59   | .55         |
|                     |       |             |

338  
339

340 **Supplementary Figures**

341 **Supplementary Figure 1.** Subject selection procedure.

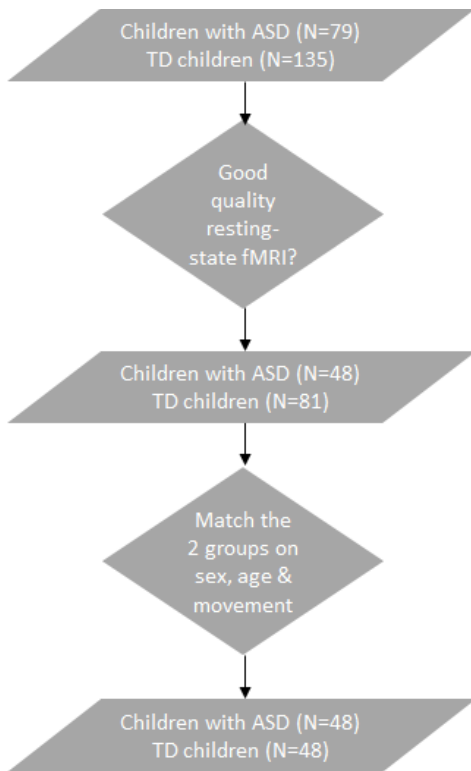

342

343 **Supplementary Figure 2.** Search of open-source autism spectrum disorder (ASD) datasets

344 yielded no subjects who had both resting state functional MRI (fMRI) data and item-level

345 Autism Diagnostic Interview-Revised (ADI-R) scores.

346

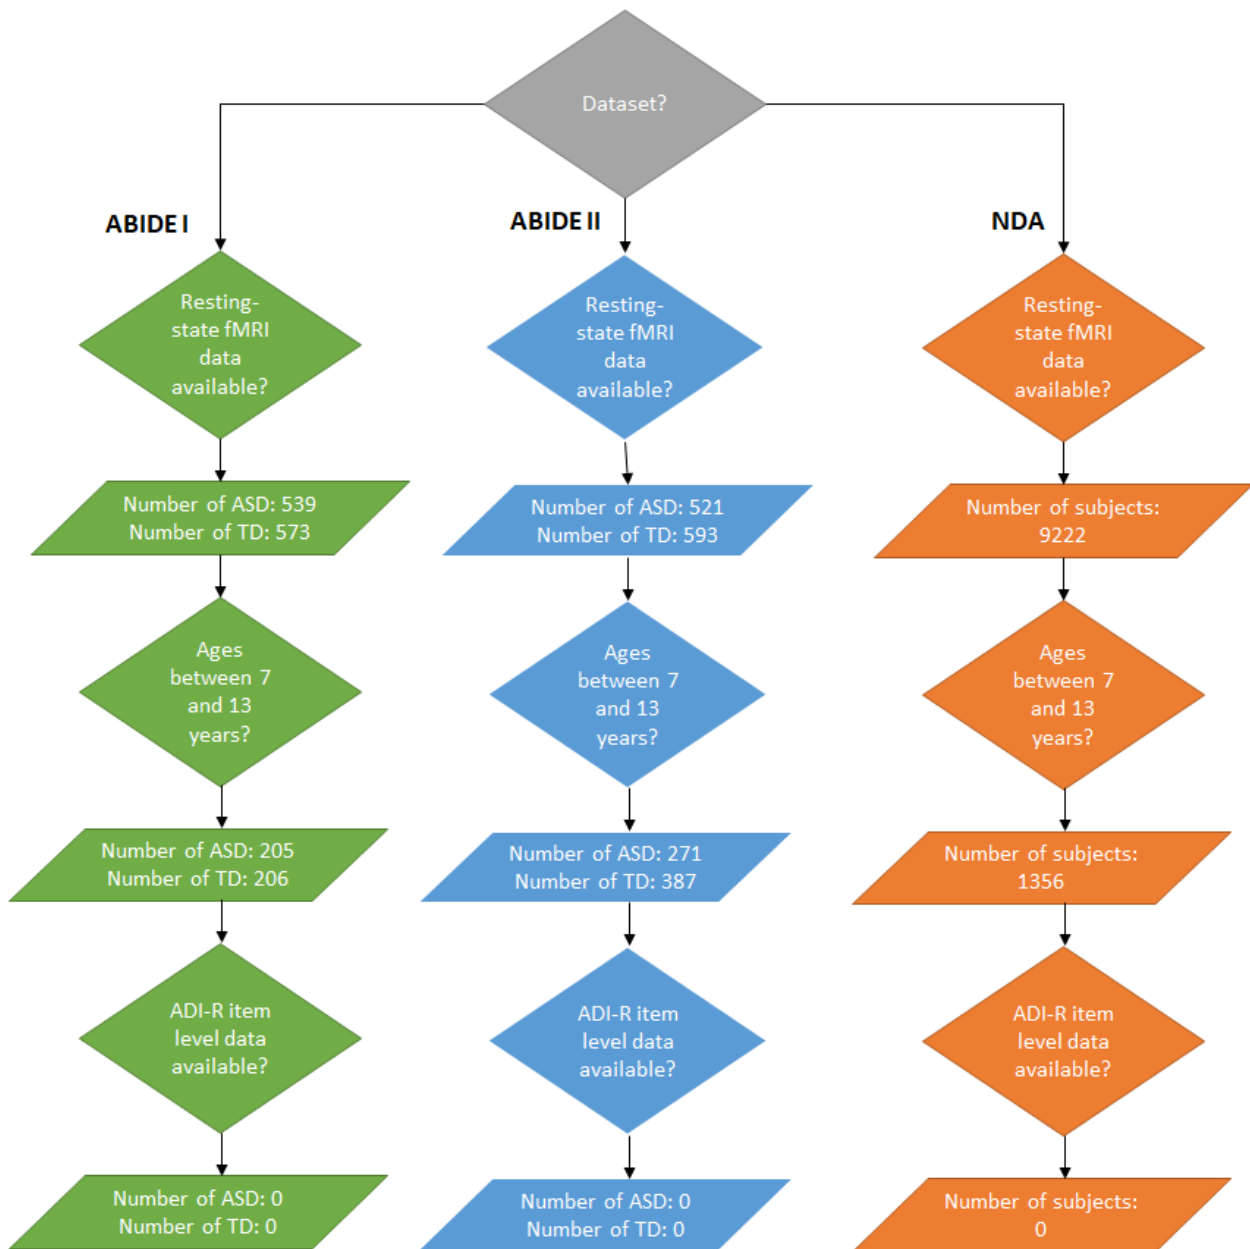

347

348

349

350 **Supplementary Figure 3. Saliency, Central Executive, Default mode, Cortical Motor and**  
351 **Subcortical Motor networks. (A) Saliency Network (SN), (B) Left Central Executive Network**  
352 **(LCEN), (C) Right Central Executive Network (RCEN), (D) Default Mode Network (DMN), (E)**  
353 **Cortical Motor Network (cMN) and (F) Subcortical Motor Network (sMN).**

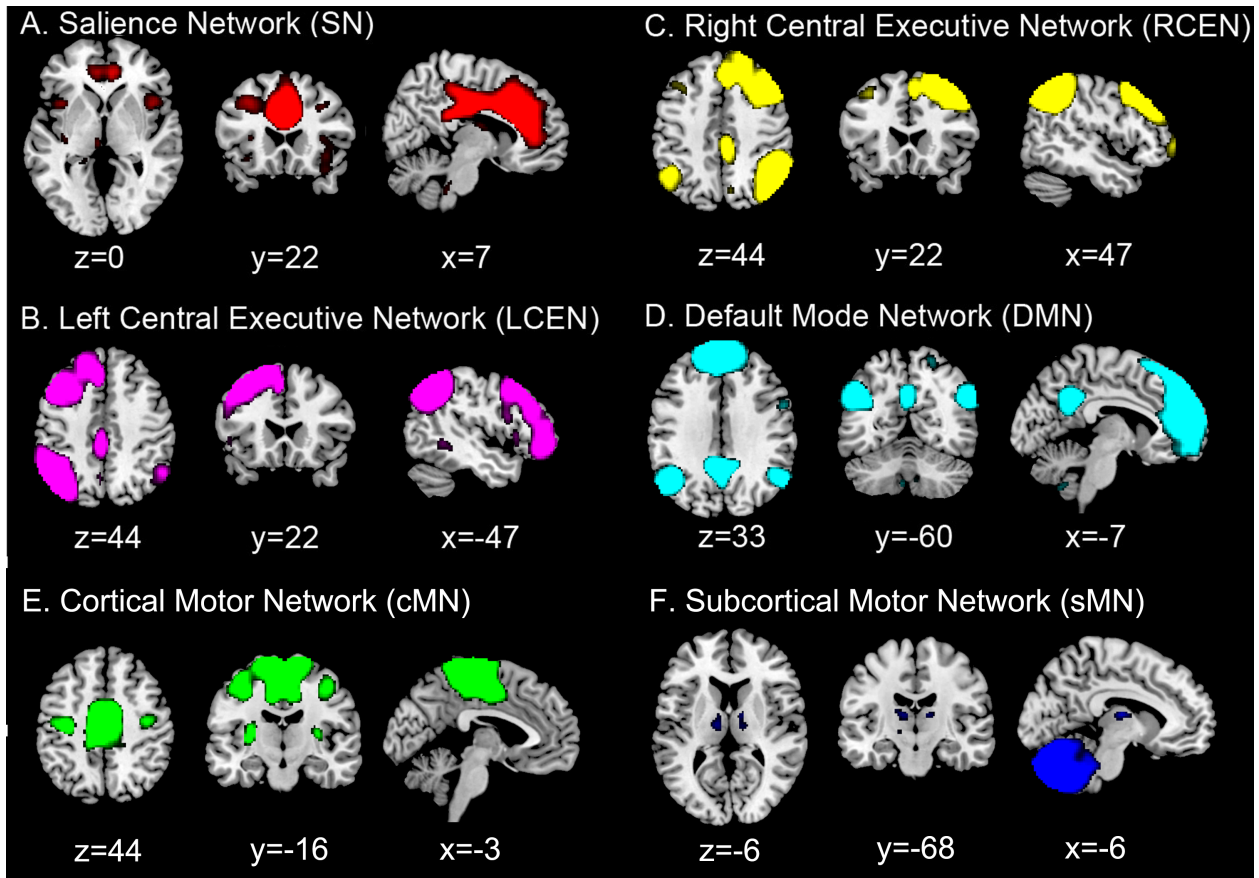

354  
355  
356

357 **Supplementary Figure 4.** Regression analysis revealed that temporal mean of dynamic cross-  
358 network interactions in the motor circuit do not predict **(a)** CI or **(b)** IS symptoms. **(c)** Regression  
359 analysis revealed that temporal mean and variability of dynamic cross-network interactions in the  
360 cognitive control circuit do not predict RM symptoms. Error band represent 95% confidence  
361 interval for the regression estimate. Cross-validation analyses confirmed these results.

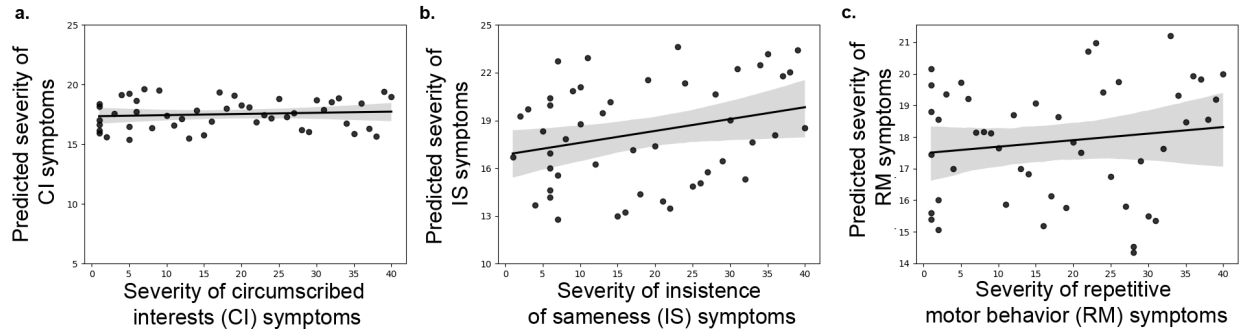

362

363



364 **References**

365 1 The Psychological, C. *Wechsler Abbreviated Scale of Intelligence*. (Harcourt Brace &  
366 Co., 1999).

367 2 Le Couteur, A. *et al.* Autism diagnostic interview: a standardized investigator-based  
368 instrument. *J Autism Dev Disord* **19**, 363-387 (1989).

369 3 Lord, C., Rutter, M. & Le Couteur, A. Autism Diagnostic Interview-Revised: a revised  
370 version of a diagnostic interview for caregivers of individuals with possible pervasive  
371 developmental disorders. *J Autism Dev Disord* **24**, 659-685 (1994).

372 4 Lord, C. Commentary: achievements and future directions for intervention research in  
373 communication and autism spectrum disorders. *J Autism Dev Disord* **30**, 393-398 (2000).

374 5 Lainhart, J. E. Advances in autism neuroimaging research for the clinician and geneticist.  
375 *Am J Med Genet C Semin Med Genet* **142C**, 33-39, doi:10.1002/ajmg.c.30080 (2006).

376 6 Lam, K. S., Bodfish, J. W. & Piven, J. Evidence for three subtypes of repetitive behavior  
377 in autism that differ in familiarity and association with other symptoms. *J Child Psychol*  
378 *Psychiatry* **49**, 1193-1200, doi:10.1111/j.1469-7610.2008.01944.x (2008).

379 7 Glover, G. H. & Law, C. S. Spiral-in/out BOLD fMRI for increased SNR and reduced  
380 susceptibility artifacts. *Magnetic Resonance in Medicine* **46**, 515-522 (2001).

381 8 Beckmann, C. F. & Smith, S. M. Probabilistic independent component analysis for  
382 functional magnetic resonance imaging. *IEEE Trans Med Imaging* **23**, 137-152,  
383 doi:10.1109/TMI.2003.822821 (2004).

384 9 Menon, V. & Uddin, L. Q. Saliency, switching, attention and control: a network model of  
385 insula function. *Brain Struct Funct* **214**, 655-667, doi:10.1007/s00429-010-0262-0  
386 (2010).

387 10 Calhoun, V. D. *et al.* fMRI activation in a visual-perception task: network of areas  
388 detected using the general linear model and independent components analysis.  
389 *NeuroImage* **14**, 1080-1088, doi:10.1006/nimg.2001.0921 (2001).

390 11 Uddin, L. Q. *et al.* Saliency network-based classification and prediction of symptom  
391 severity in children with autism. *JAMA Psychiatry* **70**, 869-879,  
392 doi:10.1001/jamapsychiatry.2013.104 (2013).

393 12 Greicius, M. D., Srivastava, G., Reiss, A. L. & Menon, V. Default-mode network activity  
394 distinguishes Alzheimer's disease from healthy aging: evidence from functional MRI.  
395 *Proc Natl Acad Sci U S A* **101**, 4637-4642, doi:10.1073/pnas.0308627101 (2004).

396 13 Uddin, L. Q., Supekar, K. S., Ryali, S. & Menon, V. Dynamic reconfiguration of  
397 structural and functional connectivity across core neurocognitive brain networks with  
398 development. *J Neurosci* **31**, 18578-18589, doi:10.1523/JNEUROSCI.4465-11.2011  
399 (2011).

400 14 Shirer, W. R., Ryali, S., Rykhlevskaia, E., Menon, V. & Greicius, M. D. Decoding  
401 subject-driven cognitive states with whole-brain connectivity patterns. *Cereb Cortex* **22**,  
402 158-165, doi:10.1093/cercor/bhr099 (2012).

403 15 Chen, T., Cai, W., Ryali, S., Supekar, K. & Menon, V. Distinct Global Brain Dynamics  
404 and Spatiotemporal Organization of the Saliency Network. *PLoS biology* **14**, e1002469,  
405 doi:10.1371/journal.pbio.1002469 (2016).

406 16 Zalesky, A., Fornito, A., Cocchi, L., Gollo, L. L. & Breakspear, M. Time-resolved  
407 resting-state brain networks. *Proceedings of the National Academy of Sciences of the*  
408 *United States of America* **111**, 10341-10346, doi:10.1073/pnas.1400181111 (2014).

409 17 Allen, E. A. *et al.* Tracking whole-brain connectivity dynamics in the resting state.  
410 *Cerebral Cortex* **24**, 663-676, doi:10.1093/cercor/bhs352 (2014).

411 18 Rashid, B. *et al.* Classification of schizophrenia and bipolar patients using static and  
412 dynamic resting-state fMRI brain connectivity. *NeuroImage* **134**, 645-657,  
413 doi:10.1016/j.neuroimage.2016.04.051 (2016).

414 19 Allen, E. A. *et al.* Tracking whole-brain connectivity dynamics in the resting state. *Cereb*  
415 *Cortex* **24**, 663-676, doi:10.1093/cercor/bhs352 (2014).

416 20 Bellec, P., Rosa-Neto, P., Lyttelton, O. C., Benali, H. & Evans, A. C. Multi-level  
417 bootstrap analysis of stable clusters in resting-state fMRI. *NeuroImage* **51**, 1126-1139,  
418 doi:10.1016/j.neuroimage.2010.02.082 (2010).

419 21 Menon, V. in *In Brain Mapping: An Encyclopedic Reference* Vol. 2 (ed Arthur W. Toga)  
420 449-459 (Academic Press: Elsevier, 2015).

421 22 Greicius, M. D., Krasnow, B., Reiss, A. L. & Menon, V. Functional connectivity in the  
422 resting brain: a network analysis of the default mode hypothesis. *Proceedings of the*  
423 *National Academy of Sciences of the United States of America* **100**, 253-258,  
424 doi:10.1073/pnas.0135058100 (2003).

425 23 Koul, A., Becchio, C. & Cavallo, A. Cross-Validation Approaches for Replicability in  
426 Psychology. *Front Psychol* **9**, 1117, doi:10.3389/fpsyg.2018.01117 (2018).

427 24 Bzdok, D. & Meyer-Lindenberg, A. Machine Learning for Precision Psychiatry:  
428 Opportunities and Challenges. *Biol Psychiatry Cogn Neurosci Neuroimaging* **3**, 223-230,  
429 doi:10.1016/j.bpsc.2017.11.007 (2018).

430 25 Hastie, T., Tibshirani, R. & Friedman, J. H. *The Elements of Statistical Learning: Data*  
431 *Mining, Inference, and Prediction*. (Springer, 2009).

432
